# Supplementary material for: Global burden and trend of acute lymphoblastic leukemia from 1990 to 2017
Source: publisher site journal article supplement (doi:10.18632/aging.103982), 2020-11-16
Supplement: Supplementary file [file aging-v12i22-103982-supplementary-material-SD1.pdf]

## SUPPLEMENTARY FIGURES

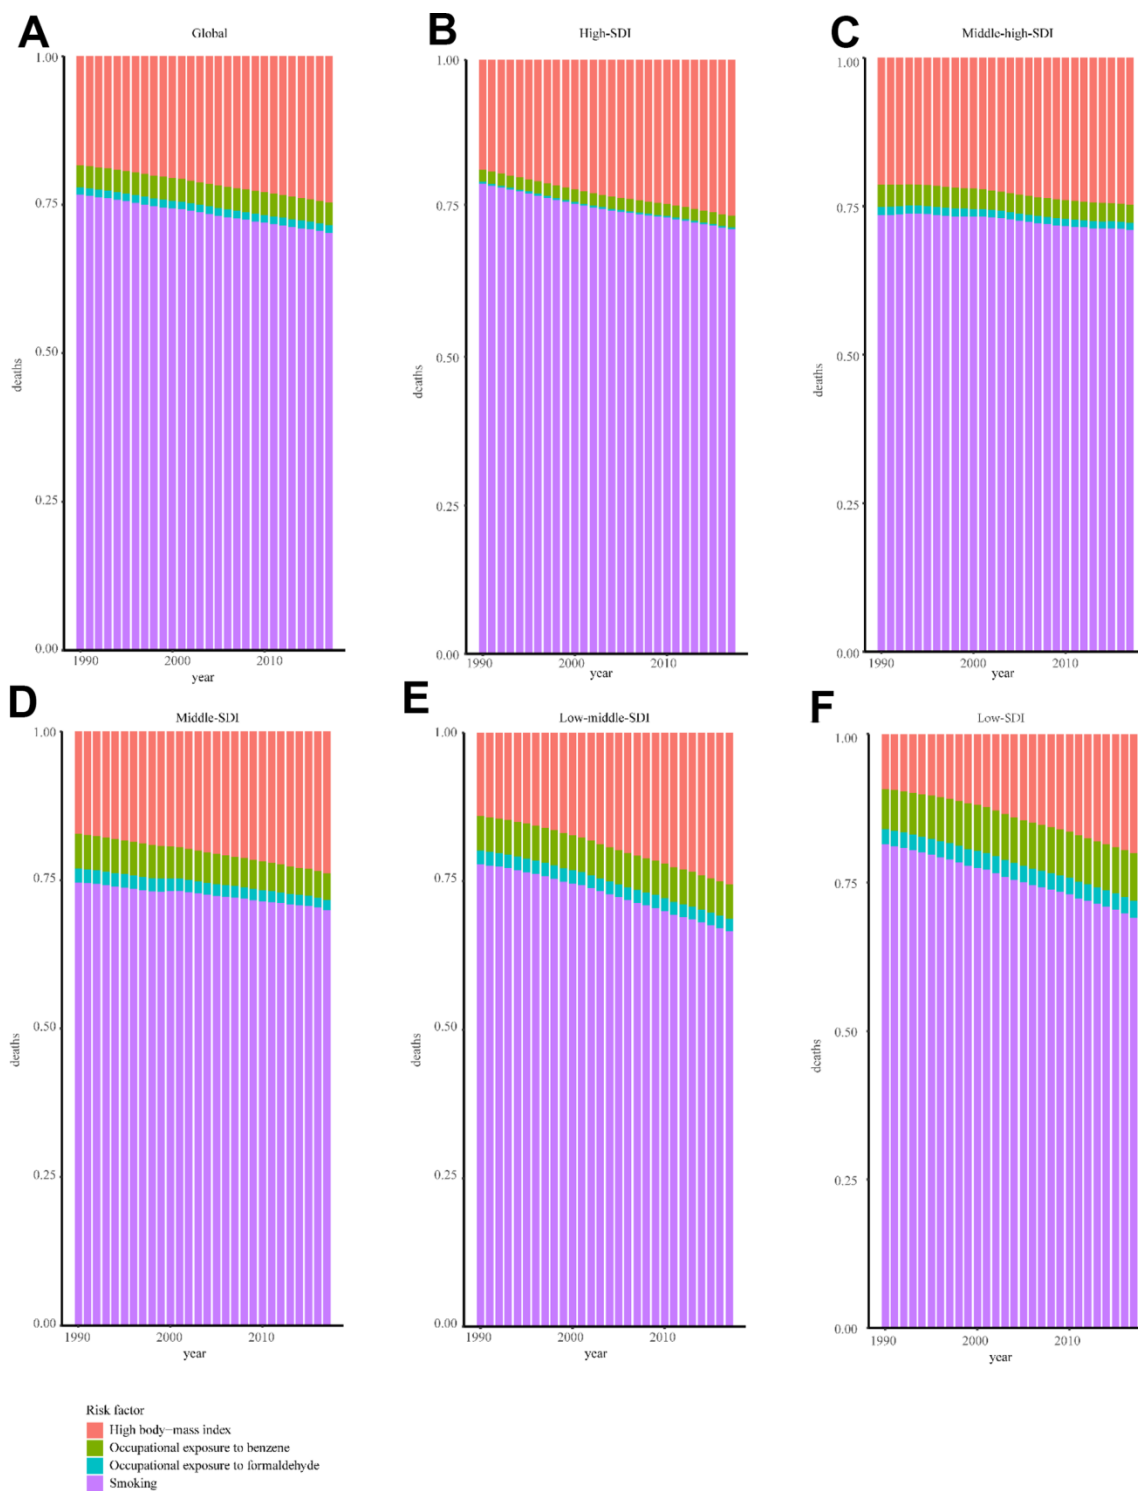

**Supplementary Figure 1.** The ratio of risk factors contributing to ALL-caused death in the global (A), high SDI region (B), high-middle SDI region (C), middle SDI region (D), low-middle SDI region (E), and low SDI region (F). SDI: Socio-demographic Index.

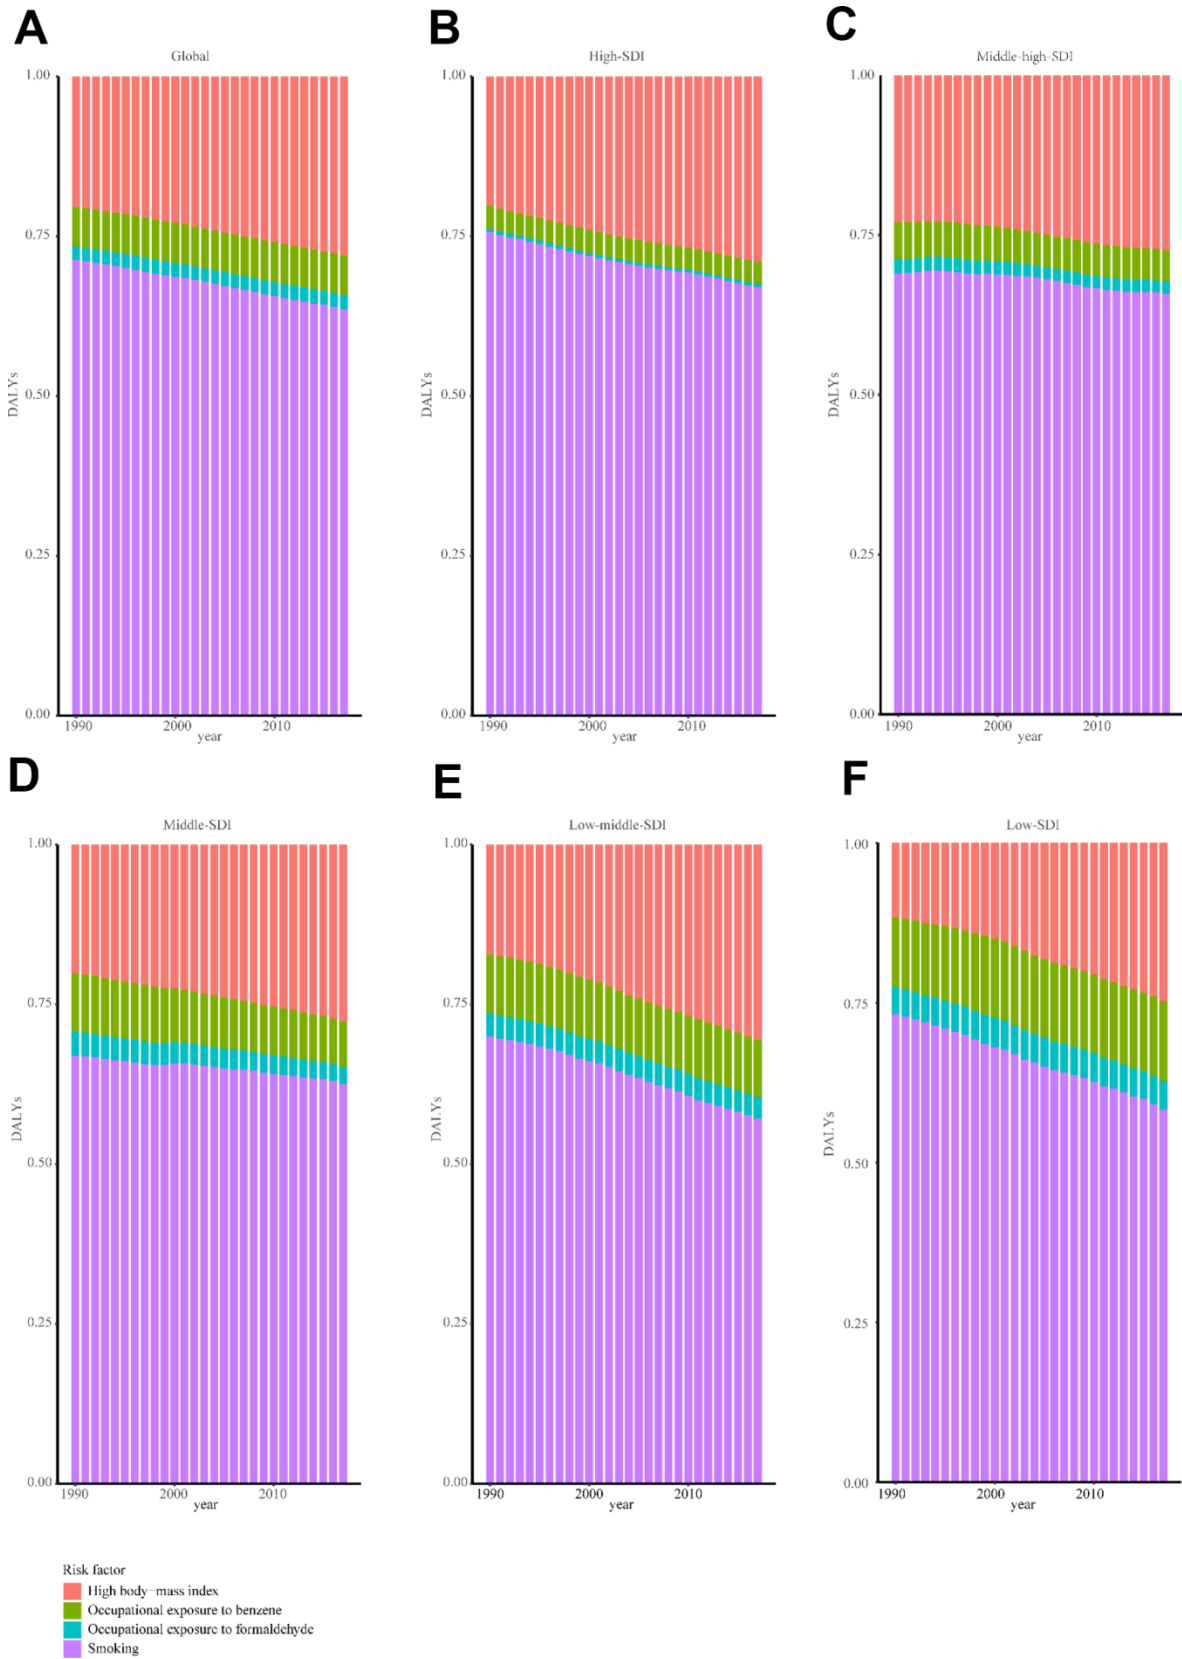

**Supplementary Figure 2.** The ratio of risk factors contributing to ALL-caused DALY in the global (A), high SDI region (B), high-middle SDI region (C), middle SDI region (D), low-middle SDI region (E), and low SDI region (F). DALY: disability adjusted life year; SDI: Socio-demographic Index.
