# Supplementary material for: Global burden and trend of acute lymphoblastic leukemia from 1990 to 2017
Source: publisher site journal article supplement (doi:10.18632/aging.103982), 2020-11-16
Supplement: Supplementary file [file aging-v12i22-103982-supplementary-material-SD2.pdf]

## SUPPLEMENTARY TABLES

**Supplementary Table 1. Top 30 countries/territories with the biggest drop in ASIR in 2017 compared to 1990.**

| Country/Territory | ASIR-1990   | ASIR-2017   | Change(%)    |
|-------------------|-------------|-------------|--------------|
| Czech Republic    | 1.70444118  | 0.416184335 | -75.58235863 |
| Moldova           | 2.07416161  | 0.78541563  | -62.13334454 |
| Ghana             | 0.990678333 | 0.393955263 | -60.23378631 |
| Greenland         | 1.039359543 | 0.4299638   | -58.63185138 |
| Guam              | 0.683243245 | 0.304279976 | -55.46535179 |
| Hungary           | 1.158125344 | 0.553921424 | -52.17085722 |
| South Korea       | 0.830602251 | 0.398224777 | -52.05589964 |
| Singapore         | 0.972292344 | 0.473770426 | -51.27284208 |
| Ireland           | 0.958707392 | 0.476495364 | -50.29814438 |
| Portugal          | 1.094743284 | 0.54648071  | -50.08138271 |
| UK                | 0.975371906 | 0.497623851 | -48.98111709 |
| Grenada           | 0.827295887 | 0.425663223 | -48.54764422 |
| Netherlands       | 0.858379537 | 0.451789964 | -47.36710922 |
| Canada            | 0.872223561 | 0.462677459 | -46.95425806 |
| Croatia           | 1.053279621 | 0.562950499 | -46.55260692 |
| France            | 0.860469991 | 0.467062191 | -45.72010696 |
| Denmark           | 1.16850441  | 0.640590085 | -45.17863348 |
| Qatar             | 1.189622774 | 0.660784651 | -44.45427025 |
| Belgium           | 0.765127831 | 0.425527438 | -44.38479163 |
| Lithuania         | 1.252188712 | 0.70092604  | -44.02392917 |
| Bahrain           | 0.982153076 | 0.550692851 | -43.93003858 |
| Luxembourg        | 0.723161985 | 0.414477003 | -42.68545479 |
| Germany           | 0.930893753 | 0.542561113 | -41.7161076  |
| Finland           | 1.232210269 | 0.718940517 | -41.65439657 |
| Bermuda           | 0.74033626  | 0.43311429  | -41.49762564 |
| Japan             | 0.904300875 | 0.53010933  | -41.379098   |
| Spain             | 0.920329377 | 0.540555299 | -41.2650174  |
| Australia         | 1.562040153 | 0.932742146 | -40.286929   |
| Israel            | 0.92440745  | 0.562882957 | -39.10878181 |
| New Zealand       | 1.464291458 | 0.904585214 | -38.22369114 |

**Supplementary Table 2. Top 30 countries/territories with the biggest rise in ASIR in 2017 compared to 1990.**

| <b>Country/Territory</b> | <b>ASIR-1990</b> | <b>ASIR-2017</b> | <b>Change(%)</b> |
|--------------------------|------------------|------------------|------------------|
| Guatemala                | 0.623604531      | 1.972724414      | 216.3422193      |
| El Salvador              | 0.456314727      | 1.332917333      | 192.1048245      |
| Ecuador                  | 1.149040472      | 2.221646264      | 93.34795573      |
| Dominica                 | 1.403302844      | 2.247426347      | 60.15262541      |
| Philippines              | 0.886534379      | 1.41587231       | 59.70867508      |
| Timor-Leste              | 0.808771264      | 1.247081505      | 54.19458632      |
| Saint Vincent            | 0.420853917      | 0.642293089      | 52.61663573      |
| Grenadines               | 0.420853917      | 0.642293089      | 52.61663573      |
| Lesotho                  | 0.123348818      | 0.180789334      | 46.56754507      |
| Pakistan                 | 0.959267942      | 1.344962632      | 40.20719065      |
| South Sudan              | 0.440881341      | 0.616906572      | 39.92576116      |
| Somalia                  | 0.564531942      | 0.787166259      | 39.4369744       |
| Tanzania                 | 0.542464015      | 0.754500192      | 39.08760246      |
| Eritrea                  | 0.665596439      | 0.915702395      | 37.57621608      |
| Libya                    | 0.547060231      | 0.751913167      | 37.44613927      |
| Mexico                   | 1.706860901      | 2.310334065      | 35.35573189      |
| Cambodia                 | 0.772675369      | 1.035146681      | 33.96915721      |
| Indonesia                | 0.814414691      | 1.086220349      | 33.374356        |
| China                    | 0.729840663      | 0.97081053       | 33.01677747      |
| Azerbaijan               | 0.654738789      | 0.855316688      | 30.63479694      |
| Laos                     | 0.955927443      | 1.248609961      | 30.61764997      |
| Central African Republic | 0.318516553      | 0.411046704      | 29.05034279      |
| Uganda                   | 0.32054807       | 0.413000208      | 28.84189518      |
| Myanmar                  | 1.050643081      | 1.333863227      | 26.95683721      |
| Honduras                 | 3.023909046      | 3.82808714       | 26.59399082      |
| Gabon                    | 0.307167136      | 0.382356481      | 24.47831689      |
| Paraguay                 | 0.846577595      | 1.049210003      | 23.93547972      |
| Guyana                   | 0.904207845      | 1.120459652      | 23.91616135      |
| Kenya                    | 0.461398528      | 0.570032709      | 23.54454437      |
| Mauritius                | 0.333233622      | 0.410143492      | 23.07986492      |

**Supplementary Table 3. Top 30 countries/territories with the most rapid rise in ASIR.**

| <b>Country/territory</b> | <b>confidence interval (Low)</b> | <b>EAPC of ASIR</b> | <b>confidence interval (high)</b> |
|--------------------------|----------------------------------|---------------------|-----------------------------------|
| El Salvador              | 4.34                             | 5.201               | 6.069                             |
| Guatemala                | 4.499                            | 4.806               | 5.115                             |
| Ecuador                  | 2.923                            | 3.245               | 3.569                             |
| Dominica                 | 1.862                            | 2.026               | 2.19                              |
| Timor-Leste              | 1.811                            | 1.938               | 2.065                             |
| Lesotho                  | 1.24                             | 1.793               | 2.349                             |
| Philippines              | 1.338                            | 1.694               | 2.051                             |
| Mauritius                | 0.796                            | 1.604               | 2.418                             |
| Libya                    | 1.296                            | 1.576               | 1.857                             |
| Paraguay                 | 0.99                             | 1.444               | 1.9                               |
| Pakistan                 | 1.255                            | 1.421               | 1.587                             |
| Grenadines               | 0.824                            | 1.404               | 1.987                             |
| Saint Vincent            | 0.824                            | 1.404               | 1.987                             |
| Indonesia                | 1.11                             | 1.36                | 1.61                              |
| Tanzania                 | 1.187                            | 1.337               | 1.486                             |
| China                    | 0.857                            | 1.312               | 1.769                             |
| Cambodia                 | 1.152                            | 1.298               | 1.445                             |
| Mexico                   | 0.989                            | 1.275               | 1.561                             |
| Brunei                   | 1.013                            | 1.26                | 1.507                             |
| Laos                     | 1.038                            | 1.25                | 1.462                             |
| Guyana                   | 0.986                            | 1.227               | 1.468                             |
| Uganda                   | 0.931                            | 1.196               | 1.461                             |
| South Sudan              | 0.827                            | 1.194               | 1.561                             |
| Gabon                    | 0.94                             | 1.17                | 1.402                             |
| Myanmar                  | 0.792                            | 1.076               | 1.361                             |
| Azerbaijan               | 0.567                            | 1.002               | 1.438                             |
| Honduras                 | 0.739                            | 0.975               | 1.212                             |
| Central African Republic | 0.87                             | 0.937               | 1.004                             |
| Somalia                  | 0.606                            | 0.936               | 1.266                             |
| Kenya                    | 0.776                            | 0.897               | 1.017                             |

**Supplementary Table 4. Top 30 countries/territories with the fastest reduction in ASIR.**

| <b>Country/territory</b> | <b>confidence interval (Low)</b> | <b>EAPC of ASIR</b> | <b>confidence interval (high)</b> |
|--------------------------|----------------------------------|---------------------|-----------------------------------|
| Ghana                    | -6.234                           | -5.175              | -4.105                            |
| Czech Republic           | -4.948                           | -4.412              | -3.874                            |
| Guam                     | -3.904                           | -3.618              | -3.331                            |
| Moldova                  | -3.796                           | -3.603              | -3.409                            |
| Greenland                | -3.658                           | -3.455              | -3.252                            |
| Bahrain                  | -3.645                           | -3.162              | -2.676                            |
| Portugal                 | -3.534                           | -3.162              | -2.787                            |
| UK                       | -3.13                            | -2.946              | -2.763                            |
| Qatar                    | -3.287                           | -2.857              | -2.424                            |
| Hungary                  | -2.908                           | -2.742              | -2.575                            |
| Singapore                | -2.903                           | -2.614              | -2.324                            |
| Canada                   | -2.811                           | -2.605              | -2.399                            |
| Luxembourg               | -2.799                           | -2.593              | -2.387                            |
| Netherlands              | -2.678                           | -2.544              | -2.411                            |
| Ireland                  | -2.709                           | -2.445              | -2.18                             |
| France                   | -2.542                           | -2.393              | -2.244                            |
| Denmark                  | -2.717                           | -2.375              | -2.031                            |
| Spain                    | -2.533                           | -2.347              | -2.16                             |
| Australia                | -2.557                           | -2.339              | -2.122                            |
| South Korea              | -2.954                           | -2.313              | -1.668                            |
| Croatia                  | -2.505                           | -2.295              | -2.085                            |
| New Zealand              | -2.478                           | -2.28               | -2.081                            |
| Finland                  | -2.565                           | -2.232              | -1.897                            |
| Japan                    | -2.288                           | -2.157              | -2.026                            |
| Germany                  | -2.436                           | -2.129              | -1.821                            |
| Niger                    | -2.352                           | -2.125              | -1.898                            |
| Israel                   | -2.465                           | -2.087              | -1.707                            |
| Ukraine                  | -2.705                           | -2.082              | -1.455                            |
| Grenada                  | -2.507                           | -2.063              | -1.616                            |
| Belgium                  | -2.278                           | -2.042              | -1.805                            |
